# Supplementary material for: Plasmonic-based Raman sensor for ultra-sensitive detection of pharmaceutical waste
Source: Royal Society of Chemistry journal article supplement (doi:10.1039/d3en00821e), 2024-01-01
Supplement: d3en00821e9.pdf [file d3en00821e9.pdf]

***Supplemental Information:***

**Plasmonic Based Raman sensor for Ultra-sensitive detection of  
Pharmaceutical waste**

Mohamed Hamode<sup>a,b</sup>, Alon Krause<sup>a,b</sup>, Maria Shehadeh<sup>a,b</sup>, Bruria Schmerling<sup>a</sup>, Tchiya Zar<sup>a,b</sup>,  
Iddo Pinkas<sup>c</sup>, David Zitoun<sup>a,b</sup>, and Adi Salomon<sup>\*a,b</sup>

- a. Department of Chemistry, Bar-Ilan University, Ramat-Gan 5290002, Israel.
- b. Institute of Nanotechnology and Advanced Materials (BINA), Bar-Ilan University,  
Ramat-Gan 5290002, Israel.
- c. Department of Chemical Research Support, Weizmann Institute of Science, Rehovot,  
Israel

\*E-mail: [Adi.Salomon@biu.ac.il](mailto:Adi.Salomon@biu.ac.il) <http://orcid.org/0000-0002-5643-0478>

## Contents

|                                                                                                   |   |
|---------------------------------------------------------------------------------------------------|---|
| : Cross-section and surface morphology analysisFigure S1 .....                                    | 3 |
| Figure S2. X-ray photoelectron spectroscopy (XPS) energy bands, Ag-Silica .....                   | 4 |
| Figure S3. Transmission spectra of the arrays.....                                                | 4 |
| Figure S4. Comparison of the Raman and SERS spectra ,Calculations of enhancement factor (EF)..... | 5 |
| Figure S5. Raman spectra taken from our plasmonic devices .....                                   | 6 |
| Table S1. Vibrational modes of the piperidine molecule .....                                      | 6 |
| Figure S6 Comparison between Raman spectra of the SERS device with and without piperidine .....   | 7 |
| Figure S7 Repeatability of the SERS device .....                                                  | 8 |
| Figure S8 Non-well milled arrays of hexagonal hole of triangular nano-cavities.....               | 8 |

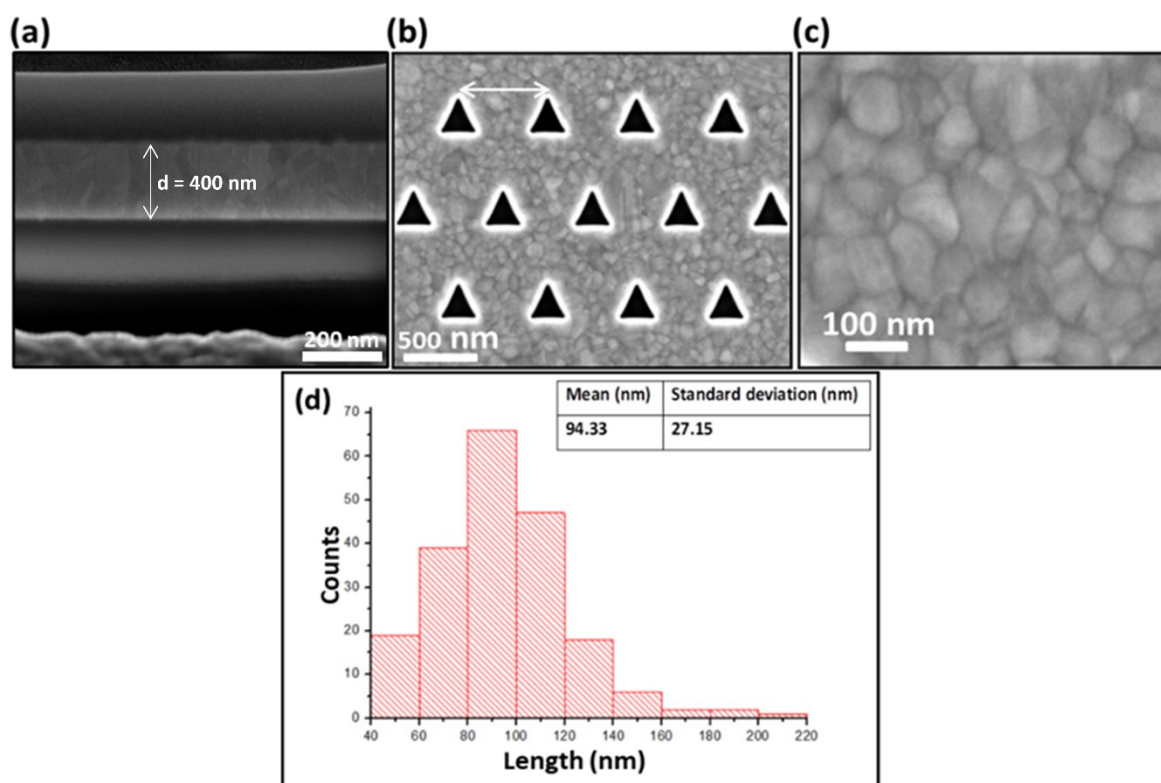

**Figure S1.** (a) HRSEM image of cross-sectional view ( $52^\circ$ ) with FIB. 200 nm thickness of Ag film on glass substrate. (b) HRSEM images: hexagonal hole-array of triangular nano-cavities with  $P=600 \text{ nm}$ . (c) a surface view ( $0^\circ$ ) typical Ag film, average grain size 94 nm (d) Histogram.

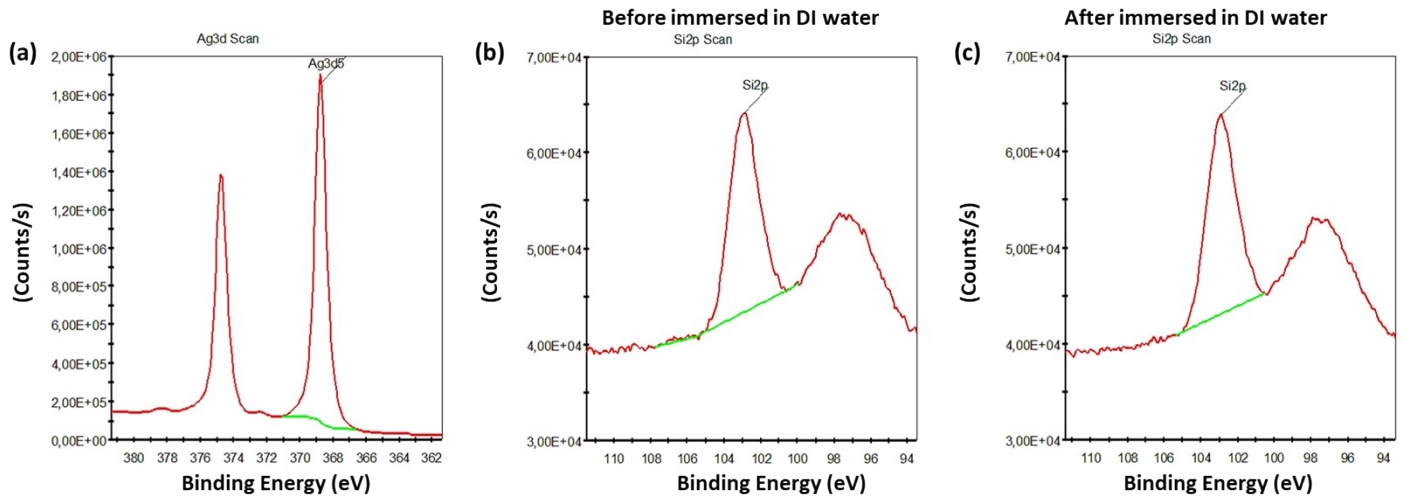

**Figure S2.** X-ray photoelectron spectroscopy (XPS) energy bands, Ag-Silica, ~5 nm layer of Silica. (a) Ag3d Scan. (b) Si2p Scan before immersed in DI water. (c) Si2p Scan After immersed in DI water.

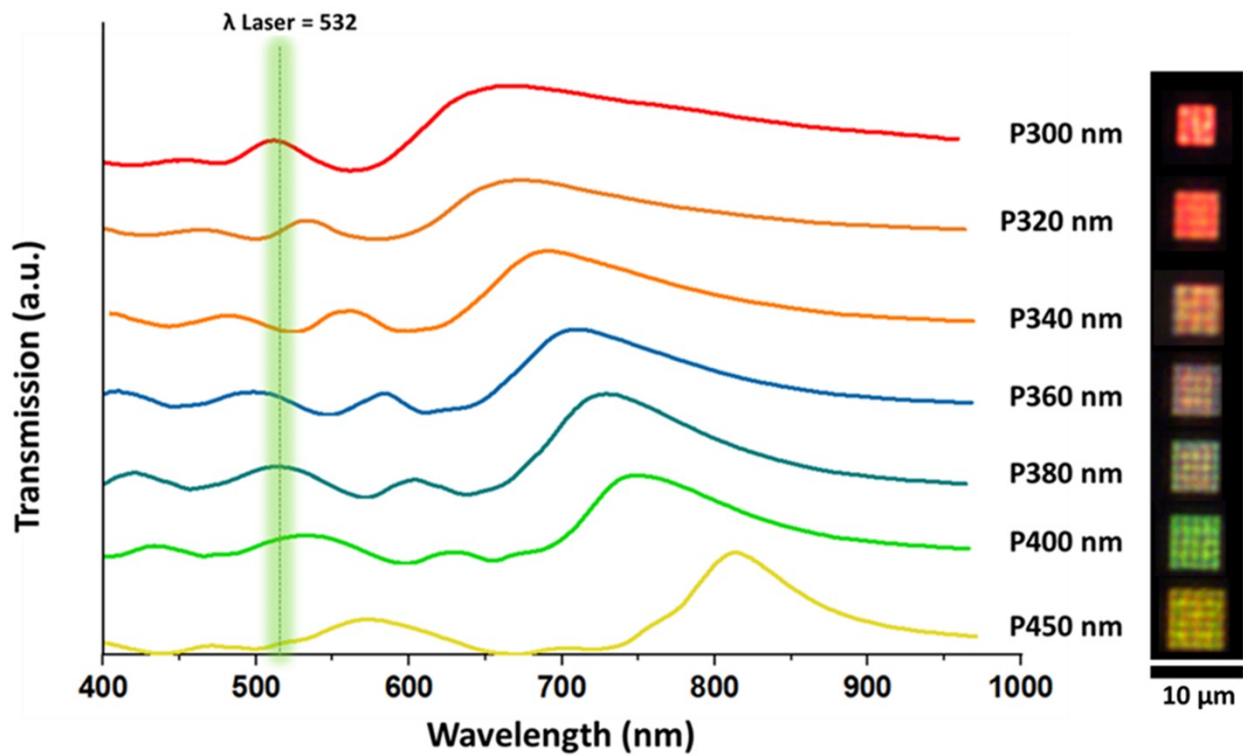

**Figure S3.** Transmission spectra- hexagonal arrays of triangular holes of Ag200nm in different periodicity, X40 magnification, 0.6 NA, black-body illumination. Transmission images of this arrays Shown from the right side of the Figure, taken at X50 magnification with 0.7 NA, black-body illumination.

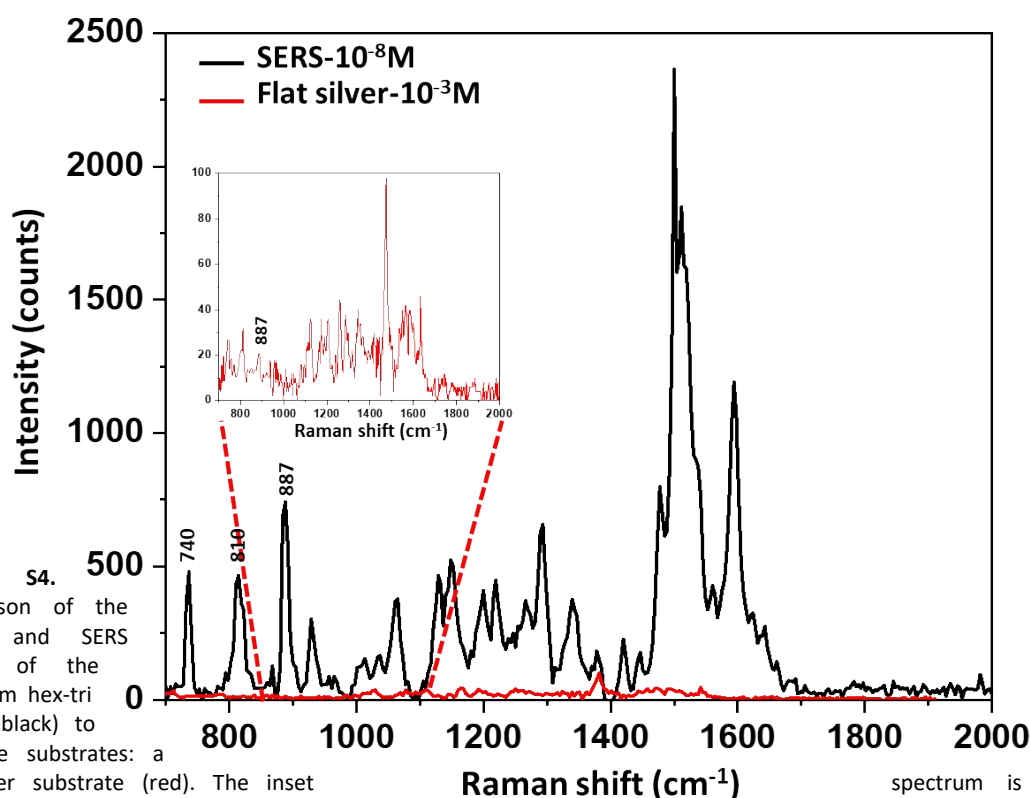

**Figure S4.** Comparison of the Raman and SERS spectra of the p=400 nm hex-tri sensor (black) to reference substrates: a flat silver substrate (red). The inset spectrum is zoom in of the red.

#### Calculations of enhancement factor (EF)

The enhancement factor (EF) of the SERS devices  $EF = 4 \times 10^6$  with respect to a silver substrate reference. Our calculations are based on the following equation:

$$EF = \frac{I(SERS) * C(Raman)}{I(Raman) * C(SERS)}$$

where  $I(SERS)$  and  $I(Raman)$  are the intensities of the SERS and reference signals, respectively, and  $C(SERS)$  and  $C(Raman)$  are the concentrations of the analyte in the SERS and reference measurements, respectively.

$$EF = \frac{I(SERS) * C(Raman)}{I(Raman) * C(SERS)} = \frac{800 * 10^{-3}M}{20 * 10^{-8}M} = 4 * 10^6$$

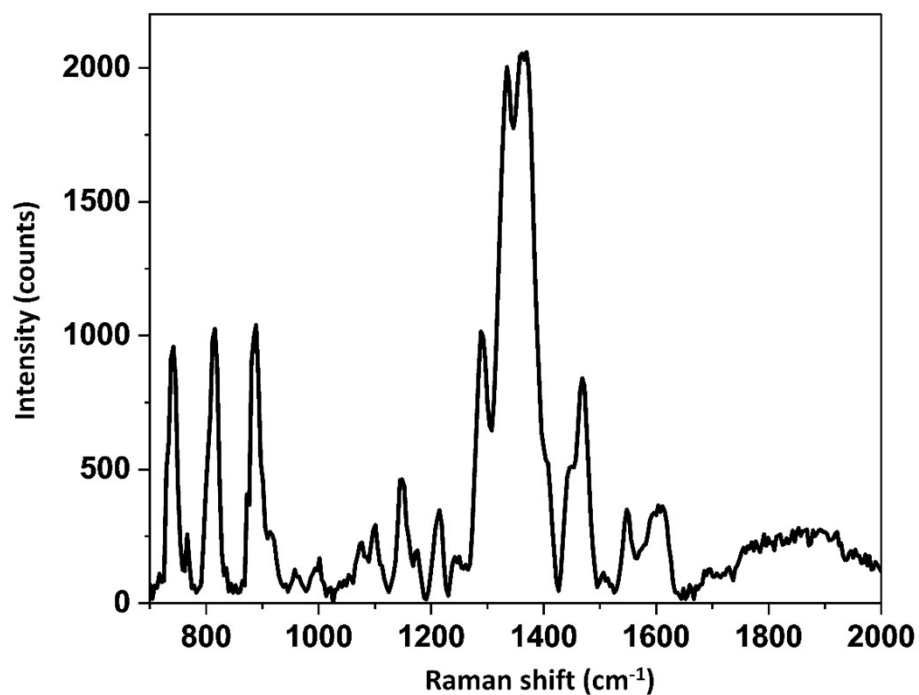

**FigureS5.** Raman spectra taken from our plasmonic devices (hexagonal triangular array with P400 nm) after being immersed in solution of piperidine in ethanol with concentration of 10<sup>-3</sup>M using N.A. of 0.6.

**Table S1.** Vibrational modes of the piperidine molecule.

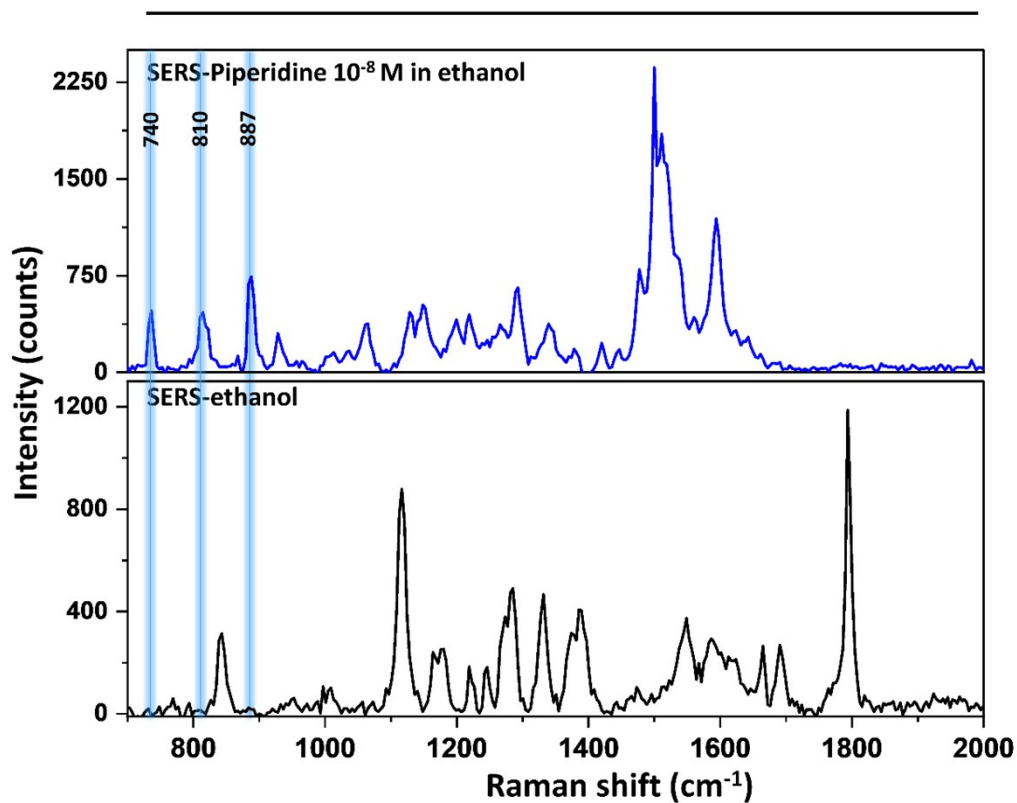

**Figure S6.** Comparison between Raman spectra of the SERS device (p400 nm), once with immersion in ethanol(black), and once with immersion in piperidine dissolved in ethanol  $10^{-8}$ M (blue), which at the end are dried in nitrogen. The laser parameters:  $\lambda=532$  nm X50 magnification, N.A.=0.6, Power=0.55mW, acquisition tim

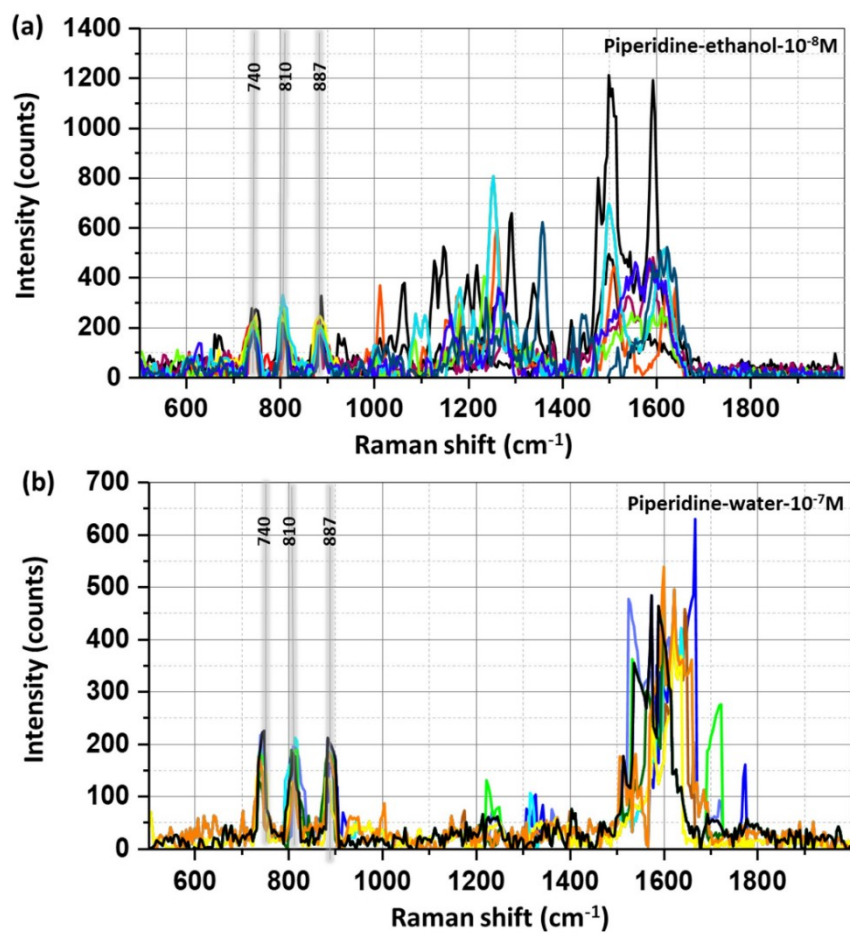

**Figure S7.** Repeatability of the SERS device (a) SERS spectra of  $10^{-8}$ M Piperidine dissolved in ethanol. (b) SERS spectra of  $10^{-7}$ M Piperidine dissolved in DI water. All the spectra taken from multiple selected spots on our device.

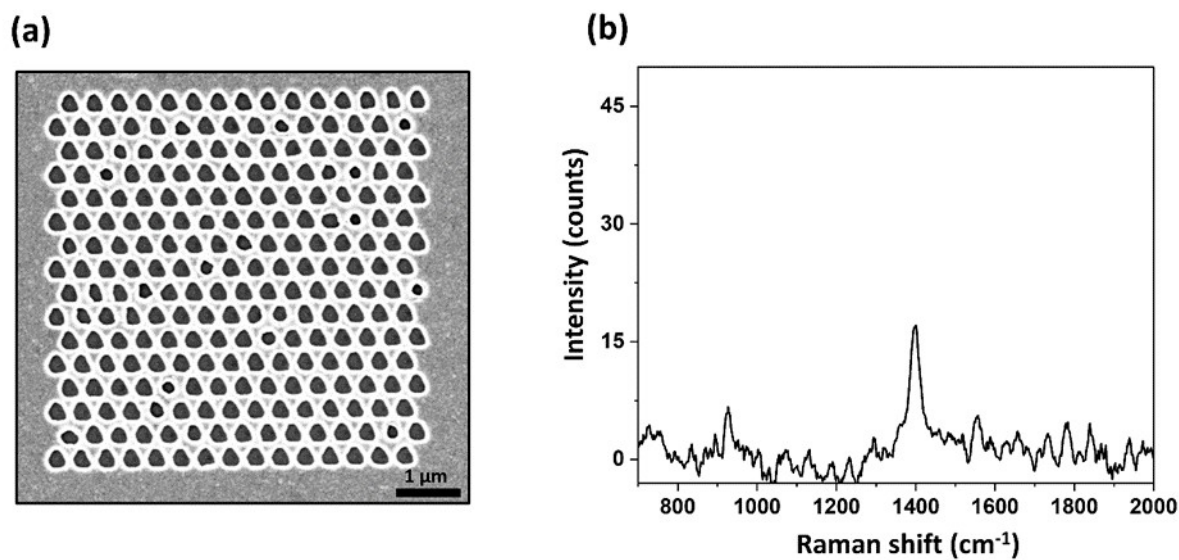

**Figure S8.** Non-well milled arrays of hexagonal hole of triangular nano-cavities with  $P=400$  nm. (a) HRSEM images of the arrays. (b) SERS measurements of Ag/SiO<sub>2</sub>/piperidine concentration  $10^{-7}$ M in ethanol.
